# Supplementary material for: Global, regional, and national burden of age-related macular degeneration, 1990–2019: an age-period-cohort analysis based on the Global Burden of Disease 2019 Study
Source: Front Public Health. 2024 Oct 22;12:1486168. doi: 10.3389/fpubh.2024.1486168 (PMC11534605; doi:10.3389/fpubh.2024.1486168)
Supplement: Supplementary file 1 [file Table_1.xlsx]

## Sheet: Table S1
Supplementary Table 1. Trends in AMD DALYs in 204 countries and regions from 1990 to 2019.
Location	1990		2019		1990-2019	P-value
	DALYs Number ×1000 (95% UI)	Age-standardized DALYs Rate per 100,000 (95% UI)	DALYs Number ×1000 (95% UI)	Age-standardized DALYs Rate per 100,000 (95% UI)	APC model estimates net drift of DALYs, % per year (95% CI)
Afghanistan	1.06(0.72-1.52)	15.98(10.9-22.81)	1.63(1.09-2.34)	17.46(11.62-25.01)	0.32(0.27-0.37)	0
Albania	0.1(0.07-0.14)	5.29(3.56-7.45)	0.19(0.13-0.28)	4.39(2.94-6.33)	-0.63(-0.72--0.54)	0
Algeria	1.91(1.23-2.8)	16.76(11.02-24.51)	4.06(2.69-5.89)	13.23(8.86-19.03)	-0.79(-0.88--0.71)	0
American Samoa	0(0-0)	4.14(2.7-6.14)	0(0-0)	3.48(2.24-5.14)	-0.59(-0.68--0.49)	0
Andorra	0(0-0.01)	8.54(5.81-12.02)	0.01(0.01-0.02)	7.31(4.95-10.25)	-0.54(-0.58--0.5)	0
Angola	0.1(0.06-0.14)	3.33(2.21-4.87)	0.24(0.15-0.35)	2.84(1.85-4.08)	-0.55(-0.59--0.52)	0
Antigua and Barbuda	0(0-0)	1.63(1.07-2.39)	0(0-0)	1.38(0.9-1.98)	-0.58(-0.63--0.52)	0
Argentina	1.07(0.7-1.58)	3.57(2.38-5.15)	1.62(1.09-2.35)	2.91(1.95-4.22)	-0.69(-0.75--0.64)	0
Armenia	0.12(0.08-0.17)	4.79(3.24-6.78)	0.18(0.12-0.26)	4.4(2.98-6.25)	-0.3(-0.37--0.23)	0
Australia	0.85(0.57-1.23)	4.52(3.04-6.54)	1.72(1.16-2.48)	3.79(2.55-5.46)	-0.62(-0.69--0.55)	0
Austria	1.17(0.79-1.67)	9.51(6.4-13.41)	1.54(1.05-2.16)	7.62(5.15-10.7)	-0.76(-0.8--0.73)	0
Azerbaijan	0.23(0.15-0.33)	5.11(3.44-7.25)	0.37(0.24-0.52)	4.6(3.1-6.54)	-0.37(-0.44--0.29)	0
Bahamas	0(0-0)	1.67(1.08-2.46)	0.01(0-0.01)	1.44(0.93-2.05)	-0.51(-0.56--0.47)	0
Bahrain	0.02(0.01-0.03)	15.77(10.28-22.82)	0.09(0.06-0.12)	11.53(7.68-16.54)	-1.07(-1.13--1.02)	0
Bangladesh	3.98(2.73-5.61)	9.67(6.7-13.51)	9.51(6.53-13.55)	7.69(5.3-10.87)	-0.8(-0.94--0.66)	0
Barbados	0(0-0)	0.57(0.37-0.83)	0(0-0)	0.51(0.34-0.73)	-0.35(-0.38--0.32)	0
Belarus	0.28(0.18-0.41)	2.17(1.42-3.12)	0.3(0.2-0.45)	1.85(1.21-2.68)	-0.57(-0.64--0.49)	0
Belgium	1.48(0.99-2.13)	9.39(6.29-13.46)	1.99(1.38-2.79)	7.58(5.26-10.67)	-0.74(-0.77--0.7)	0
Belize	0(0-0)	1.76(1.14-2.57)	0(0-0.01)	1.48(0.96-2.15)	-0.6(-0.66--0.53)	0
Benin	0.12(0.08-0.17)	6.82(4.64-9.59)	0.46(0.31-0.66)	11.04(7.55-15.68)	1.68(1.6-1.75)	0
Bermuda	0(0-0)	1.55(1.01-2.3)	0(0-0)	1.26(0.81-1.82)	-0.72(-0.77--0.67)	0
Bhutan	0.01(0.01-0.01)	5.32(3.69-7.62)	0.02(0.01-0.03)	3.72(2.52-5.25)	-1.22(-1.27--1.18)	0
Bolivia (Plurinational State of)	0.19(0.13-0.28)	6.78(4.58-9.85)	0.46(0.3-0.66)	5.57(3.75-7.97)	-0.69(-0.74--0.64)	0
Bosnia and Herzegovina	0.18(0.12-0.27)	5.16(3.55-7.48)	0.26(0.17-0.37)	4.28(2.83-6.14)	-0.64(-0.72--0.57)	0
Botswana	0.02(0.01-0.03)	3.45(2.15-5.25)	0.03(0.02-0.04)	2.52(1.58-3.75)	-1.07(-1.12--1.02)	0
Brazil	4.07(2.84-5.6)	5.17(3.59-7.12)	11.19(7.73-15.42)	4.87(3.37-6.74)	-0.22(-0.36--0.08)	0.001638
Brunei Darussalam	0(0-0)	2.38(1.55-3.53)	0(0-0.01)	2.23(1.49-3.28)	-0.23(-0.29--0.17)	0
Bulgaria	0.48(0.33-0.66)	4.03(2.82-5.48)	0.56(0.38-0.79)	3.65(2.46-5.16)	-0.32(-0.37--0.28)	0
Burkina Faso	0.16(0.11-0.24)	4.51(2.96-6.46)	0.65(0.42-0.93)	8.29(5.56-11.94)	2.11(2.01-2.21)	0
Burundi	0.15(0.1-0.22)	7.49(4.92-10.84)	0.22(0.14-0.31)	5.9(3.94-8.49)	-0.82(-0.89--0.74)	0
Cabo Verde	0.03(0.02-0.04)	12.71(8.74-17.69)	0.04(0.03-0.06)	10.45(7.1-14.68)	-0.67(-0.69--0.65)	0
Cambodia	0.3(0.2-0.44)	7.77(5.08-11.17)	0.63(0.41-0.92)	5.95(3.91-8.68)	-0.94(-1.12--0.76)	0
Cameroon	0.4(0.27-0.56)	10.67(7.3-14.88)	1.03(0.71-1.47)	10.53(7.24-14.96)	-0.03(-0.11-0.04)	0.389813
Canada	0.87(0.58-1.27)	2.73(1.82-3.95)	1.9(1.25-2.72)	2.52(1.65-3.62)	-0.28(-0.3--0.26)	0
Central African Republic	0.01(0.01-0.02)	1.62(1.09-2.35)	0.02(0.02-0.04)	1.82(1.19-2.68)	0.42(0.36-0.47)	0
Chad	0.2(0.14-0.29)	7.79(5.23-11.32)	0.5(0.34-0.72)	10.58(7.26-15.12)	1.06(1.04-1.08)	0
Chile	0.24(0.16-0.36)	2.78(1.83-4.05)	0.56(0.37-0.82)	2.32(1.53-3.4)	-0.63(-0.68--0.59)	0
China	54.89(37.53-77.77)	7.49(5.16-10.54)	142.07(97.1-197.28)	7.22(4.91-10.06)	-0.16(-0.53-0.2)	0.375831
Colombia	0.72(0.48-1.04)	4.71(3.17-6.7)	2.03(1.38-2.88)	3.8(2.57-5.39)	-0.73(-0.8--0.66)	0
Comoros	0.03(0.02-0.04)	13.73(9.04-19.92)	0.05(0.03-0.07)	10.64(7.08-15.2)	-0.87(-0.9--0.84)	0
Congo	0.03(0.02-0.04)	3.06(2.04-4.39)	0.05(0.03-0.08)	2.68(1.75-3.84)	-0.47(-0.53--0.4)	0
Cook Islands	0(0-0)	6.89(4.4-10.35)	0(0-0)	4.97(3.12-7.45)	-1.1(-1.15--1.05)	0
Costa Rica	0.06(0.04-0.09)	3.91(2.64-5.59)	0.18(0.12-0.25)	3.49(2.36-5)	-0.39(-0.46--0.32)	0
Croatia	0.27(0.18-0.39)	4.41(2.96-6.24)	0.36(0.24-0.52)	3.92(2.61-5.55)	-0.41(-0.46--0.35)	0
Cuba	0.22(0.15-0.31)	2.16(1.44-3.07)	0.37(0.24-0.54)	1.87(1.22-2.72)	-0.47(-0.56--0.39)	0
Cyprus	0.06(0.04-0.09)	8.81(5.93-12.64)	0.13(0.09-0.19)	7.18(4.88-10.15)	-0.7(-0.74--0.66)	0
Czechia	0.61(0.41-0.86)	4.44(2.98-6.2)	0.85(0.58-1.19)	3.84(2.6-5.37)	-0.48(-0.53--0.43)	0
C么te d'Ivoire	0.13(0.09-0.19)	4.89(3.29-6.92)	1.03(0.7-1.46)	11.83(8.12-16.56)	3.09(2.97-3.21)	0
Democratic People's Republic of Korea	0.32(0.21-0.46)	2.56(1.68-3.61)	0.65(0.41-0.93)	2.17(1.37-3.1)	-0.58(-0.63--0.53)	0
Democratic Republic of the Congo	0.17(0.11-0.25)	1.47(0.99-2.13)	0.43(0.28-0.62)	1.66(1.09-2.39)	0.44(0.37-0.5)	0
Denmark	0.48(0.33-0.67)	5.54(3.78-7.76)	0.6(0.41-0.87)	4.74(3.22-6.87)	-0.54(-0.58--0.5)	0
Djibouti	0.01(0.01-0.02)	13.24(8.74-19.28)	0.05(0.03-0.07)	10.08(6.69-14.59)	-0.94(-0.98--0.89)	0
Dominica	0(0-0)	1.68(1.08-2.5)	0(0-0)	1.47(0.94-2.12)	-0.46(-0.49--0.43)	0
Dominican Republic	0.08(0.05-0.13)	2.52(1.65-3.75)	0.17(0.11-0.25)	1.93(1.24-2.85)	-0.92(-0.97--0.88)	0
Ecuador	0.14(0.09-0.2)	2.84(1.89-4.08)	0.34(0.23-0.49)	2.35(1.58-3.4)	-0.65(-0.71--0.58)	0
Egypt	4.29(2.84-6.17)	16.85(11.12-24.27)	7.14(4.69-10.43)	12.9(8.48-18.52)	-0.91(-0.94--0.89)	0
El Salvador	0.16(0.11-0.23)	5.79(3.85-8.35)	0.26(0.18-0.38)	4.32(2.9-6.25)	-0.99(-1.05--0.94)	0
Equatorial Guinea	0.01(0-0.01)	3.51(2.3-5.19)	0.01(0.01-0.02)	2.89(1.88-4.26)	-0.68(-0.75--0.6)	0
Eritrea	0.08(0.05-0.12)	11.54(7.42-17.1)	0.2(0.13-0.29)	9.62(6.12-14.01)	-0.64(-0.69--0.58)	0
Estonia	0.03(0.02-0.04)	1.45(0.95-2.14)	0.04(0.02-0.05)	1.21(0.8-1.74)	-0.64(-0.74--0.55)	0
Eswatini	0.01(0-0.01)	3.22(2.11-4.76)	0.01(0.01-0.02)	2.96(1.96-4.37)	-0.3(-0.35--0.25)	0
Ethiopia	2.02(1.32-2.91)	12.15(8.14-17.26)	4.71(3.11-6.73)	13.11(8.64-18.85)	0.24(0.2-0.29)	0
Fiji	0.02(0.01-0.02)	5.37(3.5-7.97)	0.03(0.02-0.05)	4.91(3.23-7.14)	-0.3(-0.39--0.21)	0
Finland	0.68(0.46-0.98)	9.61(6.44-13.71)	1.04(0.71-1.5)	7.49(5.08-10.67)	-0.86(-0.88--0.84)	0
France	6.21(4.24-8.91)	7.03(4.82-10.02)	8.94(6.18-12.55)	5.51(3.78-7.72)	-0.84(-0.88--0.79)	0
Gabon	0.01(0.01-0.02)	3.01(2.02-4.35)	0.02(0.01-0.03)	2.52(1.65-3.66)	-0.6(-0.63--0.57)	0
Gambia	0.02(0.01-0.03)	6.65(4.47-9.2)	0.08(0.05-0.12)	9.52(6.5-13.5)	1.24(1.18-1.29)	0
Georgia	0.28(0.19-0.4)	4.74(3.22-6.77)	0.29(0.2-0.41)	4.58(3.13-6.47)	-0.1(-0.15--0.05)	‘0.000042
Germany	12.19(8.22-17.34)	9.28(6.27-13.16)	15.95(11.05-22.47)	7.3(5.01-10.33)	-0.83(-0.87--0.79)	0
Ghana	0.45(0.3-0.64)	8.81(5.97-12.49)	1.59(1.06-2.23)	11.47(7.69-16.07)	0.91(0.85-0.98)	0
Greece	1.3(0.86-1.88)	8.72(5.89-12.46)	2.01(1.36-2.89)	7.17(4.84-10.29)	-0.67(-0.69--0.64)	0
Greenland	0(0-0)	3.51(2.32-5.17)	0(0-0)	3.26(2.18-4.72)	-0.24(-0.3--0.19)	0
Grenada	0(0-0)	1.75(1.14-2.52)	0(0-0)	1.42(0.91-2.06)	-0.7(-0.73--0.66)	0
Guam	0(0-0)	3.85(2.55-5.76)	0.01(0-0.01)	3.33(2.14-4.89)	-0.48(-0.55--0.41)	0
Guatemala	0.17(0.11-0.26)	5.65(3.74-8.28)	0.46(0.3-0.67)	4.41(2.88-6.39)	-0.85(-0.89--0.8)	0
Guinea	0.27(0.18-0.39)	8.96(6.06-12.85)	0.6(0.41-0.85)	12.14(8.24-17.17)	1.05(1.01-1.1)	0
Guinea-Bissau	0.04(0.02-0.05)	10.66(7.26-15.17)	0.09(0.06-0.13)	15.49(10.64-21.79)	1.28(1.18-1.39)	0
Guyana	0.01(0-0.01)	1.82(1.19-2.67)	0.01(0.01-0.01)	1.53(0.98-2.23)	-0.58(-0.6--0.56)	0
Haiti	0.06(0.04-0.09)	2.16(1.42-3.16)	0.11(0.07-0.16)	1.83(1.19-2.69)	-0.57(-0.62--0.51)	0
Honduras	0.08(0.05-0.11)	4.37(2.87-6.24)	0.19(0.13-0.28)	3.57(2.39-5.12)	-0.69(-0.74--0.64)	0
Hungary	0.84(0.56-1.21)	5.69(3.84-8.14)	1.01(0.67-1.41)	4.95(3.31-6.94)	-0.47(-0.54--0.4)	0
Iceland	0.07(0.05-0.09)	22.51(15.5-31.39)	0.09(0.06-0.13)	14.43(9.76-20.75)	-1.53(-1.64--1.43)	0
India	48.64(32.47-68.39)	12.58(8.57-17.65)	86.26(59.29-122.4)	8.16(5.67-11.52)	-1.5(-1.63--1.37)	0
Indonesia	7.57(4.86-11.19)	9.19(6.01-13.33)	15.55(10.03-22.82)	8.3(5.38-12.03)	-0.36(-0.42--0.29)	0
Iran (Islamic Republic of)	5.96(4.01-8.47)	27.03(18.17-38.21)	14.12(9.63-19.99)	21.6(14.74-30.5)	-0.78(-0.87--0.69)	0
Iraq	1.14(0.75-1.64)	16.37(10.78-23.4)	2.58(1.72-3.71)	13.35(8.9-19.23)	-0.69(-0.74--0.64)	0
Ireland	0.37(0.25-0.53)	9.4(6.29-13.42)	0.57(0.38-0.81)	7.29(4.92-10.5)	-0.88(-0.94--0.83)	0
Israel	0.44(0.29-0.64)	9.55(6.46-13.6)	0.95(0.63-1.33)	7.63(5.13-10.81)	-0.77(-0.81--0.73)	0
Italy	18.92(12.95-27.16)	21.11(14.23-30.1)	25.59(17.49-36.52)	15.16(10.37-21.52)	-1.15(-1.21--1.09)	0
Jamaica	0.03(0.02-0.04)	1.64(1.06-2.37)	0.04(0.03-0.06)	1.36(0.89-1.94)	-0.64(-0.68--0.6)	0
Japan	3.73(2.48-5.31)	2.31(1.53-3.29)	8.62(5.82-12.29)	2(1.34-2.84)	-0.51(-0.52--0.49)	0
Jordan	0.19(0.12-0.28)	17.69(11.29-26.68)	0.65(0.42-0.94)	12.14(7.96-17.57)	-1.27(-1.32--1.21)	0
Kazakhstan	0.57(0.38-0.82)	4.99(3.36-7.06)	0.71(0.48-1.02)	4.56(3.08-6.46)	-0.3(-0.37--0.24)	0
Kenya	2.51(1.61-3.69)	34.75(22.63-50.85)	3.22(2.08-4.68)	17.43(11.28-25.1)	-2.32(-2.47--2.17)	0
Kiribati	0(0-0)	4.76(3.12-7)	0(0-0)	4.01(2.56-5.94)	-0.58(-0.63--0.53)	0
Kuwait	0.06(0.04-0.09)	13.95(9.24-19.83)	0.22(0.15-0.31)	11.25(7.54-15.96)	-0.74(-0.79--0.68)	0
Kyrgyzstan	0.22(0.15-0.3)	7.5(5.09-10.45)	0.3(0.2-0.42)	7.43(5.03-10.53)	-0.02(-0.09-0.04)	0.519672
Lao People's Democratic Republic	0.18(0.12-0.25)	9.98(6.73-14.17)	0.35(0.23-0.49)	9.37(6.35-13.2)	-0.22(-0.26--0.18)	0
Latvia	0.08(0.05-0.11)	2.16(1.42-3.14)	0.08(0.05-0.12)	1.87(1.22-2.73)	-0.5(-0.59--0.41)	0
Lebanon	0.32(0.22-0.44)	14.79(10.25-20.51)	0.64(0.43-0.91)	12.41(8.22-17.43)	-0.62(-0.72--0.52)	0
Lesotho	0.03(0.02-0.04)	3.33(2.16-4.86)	0.03(0.02-0.05)	3.12(2.04-4.55)	-0.21(-0.26--0.16)	0
Liberia	0.11(0.08-0.16)	10.89(7.35-15.65)	0.17(0.12-0.24)	10.19(7.01-14.3)	-0.22(-0.31--0.14)	0
Libya	0.2(0.13-0.29)	12.12(8.02-17.59)	0.38(0.26-0.55)	8.87(6.1-12.6)	-1.04(-1.22--0.85)	0
Lithuania	0.1(0.06-0.14)	2.1(1.38-3.04)	0.12(0.08-0.18)	1.9(1.24-2.8)	-0.36(-0.45--0.28)	0
Luxembourg	0.05(0.03-0.07)	9.25(6.23-13.07)	0.08(0.05-0.11)	7.25(4.93-10.31)	-0.84(-0.88--0.8)	0
Madagascar	0.69(0.46-0.98)	15.26(10.24-21.86)	1.02(0.68-1.47)	11.87(7.97-17.01)	-0.89(-1.09--0.68)	0
Malawi	0.39(0.25-0.57)	11.65(7.61-16.85)	0.54(0.36-0.77)	8.64(5.8-12.24)	-1(-1.11--0.89)	0
Malaysia	1.72(1.13-2.44)	21.06(13.88-29.94)	2.84(1.9-4.13)	11.35(7.72-16.32)	-2.1(-2.16--2.05)	0
Maldives	0.01(0-0.01)	8.76(5.76-12.71)	0.02(0.01-0.02)	6.21(4.1-8.96)	-1.17(-1.23--1.12)	0
Mali	0.42(0.29-0.6)	11.37(7.91-16.21)	0.72(0.47-1.05)	9.51(6.22-13.7)	-0.58(-0.79--0.37)	0
Malta	0.04(0.02-0.05)	9.29(6.33-13.23)	0.08(0.05-0.11)	7.66(5.12-10.86)	-0.67(-0.7--0.63)	0
Marshall Islands	0(0-0)	4.63(3.02-6.82)	0(0-0)	3.83(2.52-5.57)	-0.65(-0.69--0.6)	0
Mauritania	0.11(0.08-0.16)	12.39(8.35-17.49)	0.21(0.14-0.3)	11.17(7.56-15.55)	-0.35(-0.38--0.33)	0
Mauritius	0.06(0.04-0.08)	8.38(5.69-11.91)	0.11(0.07-0.16)	6.49(4.36-9.29)	-0.88(-0.9--0.86)	0
Mexico	2.2(1.51-3.2)	5.86(3.98-8.41)	5.16(3.53-7.38)	4.69(3.21-6.68)	-0.76(-0.78--0.74)	0
Micronesia (Federated States of)	0(0-0)	4.74(3.13-7.07)	0(0-0)	3.71(2.35-5.49)	-0.83(-0.93--0.74)	0
Monaco	0.01(0-0.01)	8.52(5.75-12.03)	0.01(0.01-0.01)	7.33(4.94-10.12)	-0.52(-0.56--0.47)	0
Mongolia	0.04(0.03-0.07)	4.88(3.21-7.16)	0.08(0.05-0.12)	4.42(2.95-6.46)	-0.33(-0.38--0.28)	0
Montenegro	0.03(0.02-0.04)	4.48(3.01-6.27)	0.04(0.03-0.06)	4.13(2.78-5.89)	-0.25(-0.35--0.16)	0
Morocco	1.21(0.83-1.67)	9.62(6.73-13.15)	2.5(1.64-3.58)	8.81(5.81-12.49)	-0.31(-0.35--0.26)	0
Mozambique	0.49(0.31-0.73)	9.69(6.27-14.29)	0.79(0.51-1.16)	8.74(5.64-12.73)	-0.33(-0.38--0.29)	0
Myanmar	1.17(0.75-1.72)	5.79(3.79-8.46)	2.19(1.42-3.27)	5.22(3.37-7.76)	-0.31(-0.52--0.09)	0.004768
Namibia	0.02(0.01-0.03)	3.29(2.2-4.82)	0.03(0.02-0.05)	2.78(1.83-4.05)	-0.58(-0.62--0.53)	0
Nauru	0(0-0)	4.11(2.69-6.02)	0(0-0)	3.44(2.16-5.11)	-0.61(-0.67--0.54)	0
Nepal	1.32(0.89-1.88)	16.57(11.14-23.33)	4.36(2.95-6.18)	20.71(14.06-28.91)	0.77(0.62-0.91)	0
Netherlands	1.57(1.06-2.21)	7.66(5.22-10.87)	2.26(1.55-3.17)	6.08(4.17-8.5)	-0.8(-0.82--0.77)	0
New Zealand	0.21(0.14-0.3)	5.34(3.51-7.62)	0.36(0.24-0.51)	4.25(2.84-6.07)	-0.79(-0.82--0.76)	0
Nicaragua	0.07(0.04-0.09)	4.95(3.3-7.02)	0.16(0.1-0.22)	3.97(2.66-5.68)	-0.75(-0.79--0.71)	0
Niger	0.19(0.13-0.28)	8.43(5.68-12.14)	0.69(0.46-1)	10.37(7.01-14.82)	0.72(0.66-0.79)	0
Nigeria	8.38(5.84-11.56)	20.85(14.53-28.73)	14.33(9.88-19.97)	19.15(13.27-26.73)	-0.28(-0.66-0.11)	0.158131
Niue	0(0-0)	4.07(2.63-6)	0(0-0)	3.08(2.02-4.54)	-0.94(-1.02--0.85)	0
North Macedonia	0.08(0.06-0.12)	4.97(3.38-7)	0.13(0.09-0.18)	4.22(2.83-5.95)	-0.56(-0.6--0.51)	0
Northern Mariana Islands	0(0-0)	3.66(2.4-5.43)	0(0-0)	3.04(1.99-4.39)	-0.62(-0.68--0.56)	0
Norway	0.58(0.41-0.81)	7.84(5.44-10.92)	0.74(0.51-1.01)	6.92(4.81-9.57)	-0.43(-0.45--0.4)	0
Oman	0.07(0.05-0.11)	13.67(8.99-19.56)	0.23(0.15-0.33)	17.27(11.78-24.55)	0.77(0.57-0.97)	0
Pakistan	7.56(5.27-10.5)	14.39(10.07-20.05)	10.66(7.41-14.76)	11.3(7.91-15.49)	-0.81(-0.85--0.78)	0
Palau	0(0-0)	3.84(2.51-5.59)	0(0-0)	3.04(1.99-4.5)	-0.79(-0.87--0.71)	0
Palestine	0.1(0.06-0.14)	11.99(8.01-16.97)	0.19(0.13-0.27)	9.61(6.64-13.63)	-0.82(-0.9--0.74)	0
Panama	0.06(0.04-0.09)	4.32(2.86-6.25)	0.15(0.1-0.22)	3.67(2.44-5.31)	-0.57(-0.62--0.52)	0
Papua New Guinea	0.04(0.03-0.06)	2.77(1.84-4.02)	0.09(0.06-0.14)	2.44(1.62-3.53)	-0.42(-0.49--0.35)	0
Paraguay	0.06(0.04-0.09)	3.04(2.03-4.27)	0.14(0.09-0.2)	2.64(1.78-3.75)	-0.46(-0.5--0.43)	0
Peru	1.38(0.93-1.95)	12.64(8.5-17.96)	3.6(2.46-5)	11.49(7.87-15.96)	-0.35(-0.41--0.29)	0
Philippines	2.14(1.46-3.05)	8.49(5.83-11.98)	5.39(3.67-7.63)	7.96(5.47-11.21)	-0.21(-0.27--0.14)	0
Poland	1.9(1.31-2.65)	4.46(3.08-6.19)	3.04(2.07-4.25)	4.12(2.82-5.8)	-0.27(-0.3--0.23)	0
Portugal	1.38(0.93-1.97)	10.37(7.07-14.69)	2.17(1.47-3.09)	7.86(5.33-11.23)	-0.96(-1.01--0.91)	0
Puerto Rico	0.05(0.03-0.08)	1.49(0.97-2.18)	0.09(0.06-0.14)	1.21(0.77-1.76)	-0.72(-0.77--0.66)	0
Qatar	0.01(0.01-0.01)	13.94(9.35-20.06)	0.05(0.03-0.08)	7.8(5.49-10.95)	-1.97(-2.14--1.79)	0
Republic of Korea	0.77(0.48-1.13)	3.4(2.22-4.92)	1.82(1.19-2.61)	2.08(1.38-2.99)	-1.68(-1.73--1.63)	0
Republic of Moldova	0.13(0.09-0.19)	3.26(2.15-4.75)	0.17(0.12-0.25)	2.97(1.99-4.16)	-0.33(-0.43--0.24)	0
Romania	1.36(0.91-1.96)	5.09(3.42-7.35)	1.73(1.15-2.46)	4.4(2.97-6.27)	-0.48(-0.53--0.44)	0
Russian Federation	3.99(2.65-5.75)	2.34(1.59-3.37)	4.81(3.23-6.81)	1.99(1.35-2.84)	-0.57(-0.63--0.5)	0
Rwanda	0.32(0.2-0.47)	12.83(8.3-18.57)	0.43(0.28-0.64)	8.58(5.63-12.51)	-1.37(-1.42--1.31)	0
Saint Kitts and Nevis	0(0-0)	1.62(1.07-2.33)	0(0-0)	1.35(0.88-1.97)	-0.62(-0.66--0.58)	0
Saint Lucia	0(0-0)	1.68(1.09-2.42)	0(0-0)	1.42(0.93-2.03)	-0.57(-0.6--0.55)	0
Saint Vincent and the Grenadines	0(0-0)	1.67(1.06-2.47)	0(0-0)	1.43(0.92-2.11)	-0.55(-0.59--0.51)	0
Samoa	0(0-0.01)	4.32(2.77-6.36)	0(0-0.01)	3.45(2.25-5.03)	-0.75(-0.79--0.72)	0
San Marino	0(0-0)	8.61(5.85-12.23)	0.01(0-0.01)	7.34(4.99-10.26)	-0.55(-0.56--0.54)	0
Sao Tome and Principe	0.01(0.01-0.01)	12.39(8.35-17.59)	0.01(0.01-0.01)	11.16(7.65-15.69)	-0.36(-0.38--0.33)	0
Saudi Arabia	1.44(0.95-2.05)	29.6(19.51-42.16)	2.68(1.75-3.87)	21.02(13.88-30.23)	-1.15(-1.24--1.07)	0
Senegal	0.33(0.22-0.46)	11.28(7.71-15.98)	0.81(0.55-1.17)	12.15(8.21-17.24)	0.28(0.18-0.37)	0
Serbia	0.52(0.34-0.75)	4.9(3.3-6.96)	0.69(0.46-0.98)	4.2(2.81-5.94)	-0.52(-0.59--0.46)	0
Seychelles	0.01(0-0.01)	9.24(6.15-13.1)	0.01(0-0.01)	7.33(4.96-10.47)	-0.8(-0.81--0.78)	0
Sierra Leone	0.13(0.09-0.19)	7.75(5.33-10.96)	0.22(0.15-0.31)	7.26(4.96-10.29)	-0.22(-0.3--0.14)	0
Singapore	0.05(0.03-0.07)	2.67(1.76-3.83)	0.19(0.12-0.27)	2.51(1.66-3.64)	-0.21(-0.25--0.17)	0
Slovakia	0.28(0.19-0.4)	4.71(3.16-6.67)	0.39(0.26-0.55)	4.14(2.76-5.83)	-0.43(-0.47--0.38)	0
Slovenia	0.11(0.07-0.15)	4.37(3-6.18)	0.18(0.12-0.25)	3.84(2.58-5.44)	-0.44(-0.51--0.37)	0
Solomon Islands	0(0-0.01)	4.16(2.7-6.13)	0.01(0.01-0.01)	3.55(2.3-5.14)	-0.53(-0.6--0.46)	0
Somalia	0.19(0.12-0.27)	9.6(6.24-14.12)	0.49(0.3-0.73)	9.24(5.99-13.65)	-0.13(-0.19--0.07)	’0.000022
South Africa	0.58(0.39-0.82)	3.09(2.11-4.34)	1.36(0.93-1.95)	3.42(2.35-4.86)	0.36(0.32-0.4)	0
South Sudan	0.14(0.09-0.21)	7.01(4.56-10.2)	0.18(0.12-0.27)	6.09(4.06-8.87)	-0.46(-0.56--0.36)	0
Spain	10.52(7.09-15.01)	19.22(13.08-27.12)	17.35(11.95-24.37)	15.82(10.86-22.11)	-0.72(-0.91--0.54)	0
Sri Lanka	0.78(0.52-1.11)	8.17(5.46-11.54)	1.58(1.06-2.28)	6.33(4.28-8.93)	-0.85(-0.91--0.79)	0
Sudan	1.45(0.92-2.17)	17.37(11.02-25.65)	2.17(1.42-3.1)	13.94(9.17-20.11)	-0.75(-0.82--0.68)	0
Suriname	0.01(0.01-0.01)	3.3(2.14-4.73)	0.02(0.01-0.02)	3.07(2.07-4.29)	-0.25(-0.31--0.18)	0
Sweden	1.46(0.99-2.12)	8.84(5.97-12.79)	1.81(1.25-2.62)	7.44(5.11-10.71)	-0.6(-0.64--0.55)	0
Switzerland	0.94(0.64-1.33)	8.5(5.78-11.99)	1.45(0.99-2.04)	7.27(4.98-10.27)	-0.53(-0.57--0.5)	0
Syrian Arab Republic	0.8(0.52-1.16)	17.25(11.26-24.78)	1.51(0.99-2.16)	13.47(8.95-19.41)	-0.84(-0.87--0.82)	0
Taiwan (Province of China)	0.15(0.09-0.21)	1.08(0.68-1.58)	0.45(0.26-0.67)	1.1(0.65-1.65)	0.07(0-0.13)	0.051288
Tajikistan	0.14(0.09-0.19)	5.17(3.5-7.29)	0.19(0.13-0.27)	4.89(3.29-6.95)	-0.18(-0.25--0.11)	0
Thailand	2.44(1.68-3.33)	7.83(5.42-10.76)	4.43(2.92-6.29)	4.33(2.86-6.1)	-2(-2.06--1.94)	0
Timor-Leste	0.03(0.02-0.05)	15.99(10.6-23.24)	0.09(0.06-0.13)	11.82(7.89-16.88)	-1.02(-1.1--0.95)	0
Togo	0.1(0.07-0.15)	10.25(6.93-14.54)	0.37(0.25-0.52)	12.02(8.2-17.01)	0.54(0.51-0.58)	0
Tokelau	0(0-0)	4.48(2.9-6.61)	0(0-0)	3.33(2.17-4.88)	-1.01(-1.08--0.94)	0
Tonga	0(0-0)	4.05(2.64-6)	0(0-0)	3.08(1.98-4.53)	-0.93(-1.05--0.8)	0
Trinidad and Tobago	0.01(0.01-0.02)	1.66(1.08-2.43)	0.02(0.02-0.04)	1.36(0.89-1.97)	-0.68(-0.75--0.61)	0
Tunisia	0.82(0.52-1.21)	17.45(11.26-25.66)	1.5(0.98-2.18)	12.35(8.12-17.75)	-1.18(-1.28--1.09)	0
Turkey	3.44(2.28-4.97)	10.67(7.07-15.34)	7.04(4.67-10.15)	8.28(5.49-11.97)	-0.84(-0.92--0.77)	0
Turkmenistan	0.07(0.04-0.09)	3.81(2.59-5.37)	0.12(0.08-0.16)	3.41(2.3-4.81)	-0.38(-0.44--0.31)	0
Tuvalu	0(0-0)	4.73(3.04-6.96)	0(0-0)	3.64(2.35-5.4)	-0.89(-0.92--0.86)	0
Uganda	0.41(0.27-0.58)	7.3(4.94-10.2)	0.83(0.55-1.2)	7.19(4.73-10.31)	-0.06(-0.14-0.02)	0.128517
Ukraine	1.58(1.04-2.31)	2.26(1.51-3.26)	1.63(1.06-2.37)	2.06(1.35-2.99)	-0.35(-0.43--0.28)	0
United Arab Emirates	0.04(0.03-0.06)	16.27(10.65-23.28)	0.27(0.17-0.38)	12.79(8.48-18.04)	-0.82(-0.9--0.74)	0
United Kingdom	8.8(6.12-12.25)	9.35(6.49-12.98)	11.94(8.29-16.51)	8.61(5.96-11.91)	-0.29(-0.3--0.28)	0
United Republic of Tanzania	1.92(1.32-2.67)	19.94(13.84-27.76)	3.28(2.21-4.7)	15.49(10.45-22.36)	-0.89(-1--0.77)	0
United States Virgin Islands	0(0-0)	1.63(1.07-2.41)	0(0-0)	1.38(0.89-1.97)	-0.58(-0.61--0.54)	0
United States of America	9.92(6.81-14.2)	2.93(2.01-4.18)	16.27(11.28-23.01)	2.65(1.82-3.75)	-0.34(-0.38--0.3)	0
Uruguay	0.14(0.09-0.21)	3.62(2.39-5.22)	0.19(0.13-0.28)	3.15(2.11-4.53)	-0.48(-0.53--0.44)	0
Uzbekistan	0.52(0.35-0.75)	5.05(3.37-7.22)	0.75(0.5-1.06)	4.69(3.13-6.5)	-0.25(-0.31--0.19)	0
Vanuatu	0(0-0)	4.55(3.1-6.47)	0.01(0-0.01)	3.29(2.15-4.83)	-1.11(-1.18--1.04)	0
Venezuela (Bolivarian Republic of)	0.33(0.22-0.48)	3.93(2.6-5.71)	0.94(0.63-1.35)	3.4(2.27-4.94)	-0.49(-0.53--0.44)	0
Viet Nam	4.04(2.76-5.87)	10.79(7.39-15.41)	6.51(4.42-9.1)	7.76(5.31-10.85)	-1.16(-1.26--1.05)	0
Yemen	0.6(0.39-0.89)	14.42(9.35-20.87)	1.84(1.24-2.62)	16.34(11.11-22.92)	0.45(0.39-0.51)	0
Zambia	0.17(0.11-0.25)	7.17(4.78-10.35)	0.25(0.17-0.37)	4.61(3.08-6.75)	-1.52(-1.56--1.48)	0
Zimbabwe	0.1(0.06-0.15)	2.86(1.87-4.18)	0.15(0.1-0.23)	2.67(1.79-3.94)	-0.21(-0.32--0.11)	‘0.00003
The age-standardized DALYs rate was calculated using direct standardization of the GBD 2019 Global Standard population. The parentheses after the GBD estimate indicate 95% uncertainty intervals. The net drift is an estimate obtained from the APC model that represents the overall annual percentage change in DALYs, with 95% confidence intervals in parentheses. AMD: age-related macular degeneration,…
